# Supplementary material for: Studies on the Prediction and Extraction of Methanol and Dimethyl Carbonate by Hydroxyl Ammonium Ionic Liquids
Source: MDPI journal article supplement (doi:10.3390/molecules28052312), 2023-03-02

# SUPPORTING FILES

## Tables

### Table S1 S of ILs predicted by COSMO-RS

### Table S2 SP of ILs predicted by COSMO-RS

### Table S3 SL of ILs predicted by COSMO-RS.

## Table S1

| <div>cation</div> <div>anion</div> | PF6   | TF2n  | OTf   | DMP    | 2-CP   | 3-CP   | HSO4    | NO3     | H2PO4   | HC03    | Frc     | Ac      | Prp     | BEN    | Leu    | 4FP60  | 4-CP   | 3FP60  | 2FP60  | SCN    | BF4    | BCN4  |
|------------------------------------|-------|-------|-------|--------|--------|--------|---------|---------|---------|---------|---------|---------|---------|--------|--------|--------|--------|--------|--------|--------|--------|-------|
| P4444                              | 0.675 | 0.115 | 4.052 | 12.331 | 19.755 | 21.827 | 1.546   | 2.983   | 11.965  | 15.889  | 36.502  | 115.107 | 120.720 | 51.358 | 62.394 | 48.773 | 33.485 | 28.351 | 27.075 | 1.243  | 0.289  | 0.141 |
| P4442                              | 0.081 | 0.120 | 4.165 | 12.647 | 19.203 | 21.112 | 1.725   | 2.247   | 12.787  | 16.671  | 37.229  | 113.993 | 118.746 | 50.319 | 62.121 | 46.840 | 32.183 | 27.463 | 26.381 | 1.317  | 0.323  | 0.147 |
| N4444                              | 0.078 | 0.119 | 4.090 | 12.514 | 18.651 | 20.565 | 1.640   | 2.174   | 12.329  | 16.303  | 36.641  | 111.277 | 115.436 | 48.762 | 60.619 | 45.368 | 31.274 | 26.646 | 25.606 | 1.269  | 0.308  | 0.145 |
| N2222                              | 0.128 | 0.150 | 4.634 | 13.388 | 18.167 | 19.673 | 2.282   | 2.542   | 12.638  | 14.900  | 30.229  | 89.605  | 101.315 | 45.222 | 58.067 | 41.828 | 29.173 | 25.503 | 24.767 | 1.594  | 0.498  | 0.186 |
| P2221                              | 0.126 | 0.149 | 4.626 | 13.430 | 17.811 | 19.277 | 2.325   | 2.612   | 13.029  | 15.485  | 31.332  | 91.123  | 101.213 | 44.768 | 57.851 | 40.997 | 28.559 | 25.006 | 24.348 | 1.599  | 0.500  | 0.185 |
| MEA                                | 0.174 | 1.124 | 9.088 | 14.944 | 2.610  | 2.185  | 121.919 | 122.788 | 145.835 | 118.308 | 112.291 | 64.079  | 29.659  | 12.730 | 23.137 | 3.667  | 2.450  | 3.130  | 4.216  | 10.616 | 3.258  | 0.782 |
| ENIM                               | 0.240 | 0.223 | 4.978 | 13.412 | 10.961 | 11.608 | 19.955  | 3.682   | 13.489  | 15.083  | 25.476  | 56.733  | 60.288  | 28.602 | 40.232 | 22.077 | 15.877 | 14.796 | 15.197 | 2.266  | 1.014  | 0.295 |
| DEA                                | 1.118 | 1.650 | 9.102 | 10.617 | 3.216  | 2.904  | 26.575  | 41.176  | 48.613  | 44.142  | 38.692  | 30.844  | 19.181  | 10.150 | 15.330 | 4.154  | 3.107  | 4.590  | 16.349 | 21.278 | 1.504  |       |
| WMIM                               | 0.323 | 0.239 | 5.287 | 13.104 | 11.349 | 11.918 | 3.823   | 3.279   | 10.611  | 10.980  | 18.176  | 44.332  | 53.179  | 27.629 | 37.669 | 22.220 | 16.129 | 15.184 | 15.536 | 2.356  | 1.207  | 0.333 |
| N11116                             | 0.084 | 0.123 | 3.104 | 10.379 | 10.285 | 11.108 | 3.734   | 2.013   | 9.219   | 12.363  | 25.118  | 62.915  | 62.589  | 27.490 | 37.247 | 22.451 | 15.995 | 14.088 | 13.979 | 1.102  | 0.329  | 0.148 |
| P4442OH                            | 0.479 | 0.490 | 3.689 | 11.745 | 10.305 | 11.497 | 1.573   | 2.558   | 12.079  | 15.192  | 28.152  | 56.622  | 53.344  | 21.803 | 33.958 | 23.899 | 16.594 | 14.456 | 14.731 | 1.349  | 0.852  | 0.445 |
| WMIM                               | 0.572 | 0.443 | 6.581 | 13.590 | 6.623  | 6.644  | 2.444   | 8.947   | 19.065  | 18.625  | 24.773  | 40.813  | 38.806  | 19.858 | 29.129 | 12.128 | 8.446  | 8.918  | 9.869  | 5.616  | 4.598  | 0.525 |
| N1111OH                            | 1.895 | 0.770 | 6.083 | 11.279 | 8.584  | 8.896  | 11.889  | 3.521   | 7.903   | 6.965   | 9.870   | 21.719  | 28.512  | 16.231 | 23.699 | 15.949 | 11.501 | 11.469 | 11.962 | 3.103  | 3.747  | 0.842 |
| P4442COOH                          | 1.957 | 1.478 | 3.141 | 10.166 | 5.342  | 5.915  | 5.184   | 2.750   | 10.464  | 12.949  | 33.967  | 30.085  | 12.260  | 20.722 | 11.090 | 7.993  | 7.257  | 7.659  | 1.373  | 2.095  | 1.051  |       |
| N1111COOH                          | 5.415 | 2.179 | 5.893 | 10.691 | 5.013  | 5.047  | 3.198   | 7.947   | 13.625  | 12.607  | 15.500  | 22.698  | 21.791  | 11.846 | 17.896 | 8.936  | 6.263  | 6.704  | 7.446  | 5.532  | 13.433 | 1.819 |
| TEA                                | 3.182 | 2.067 | 7.900 | 8.558  | 3.218  | 3.110  | 12.593  | 18.426  | 21.245  | 18.918  | 18.402  | 18.817  | 14.662  | 8.578  | 11.973 | 4.225  | 3.311  | 3.896  | 4.381  | 11.988 | 20.474 | 2.097 |

## Table S2

| <div>cation</div> <div>anion</div> | PF6    | TF2n  | BCN4  | BF4   | HSO4  | SCN   | NO3   | OTf   | H2PO4  | HC03   | DMP    | 2-CP   | 3-CP   | 2FP60  | 3FP60  | Frc    | 4-CP   | BEN    | 4FP60  | Leu    | Ac      | Prp     |
|------------------------------------|--------|-------|-------|-------|-------|-------|-------|-------|--------|--------|--------|--------|--------|--------|--------|--------|--------|--------|--------|--------|---------|---------|
| N11116                             | 0.291  | 0.369 | 0.547 | 0.747 | 2.182 | 2.452 | 3.202 | 5.574 | 7.997  | 12.066 | 13.535 | 20.913 | 22.425 | 26.224 | 27.205 | 27.981 | 31.089 | 41.027 | 41.298 | 45.125 | 66.564  | 69.069  |
| N2222                              | 0.198  | 0.320 | 0.457 | 0.686 | 2.427 | 2.815 | 4.564 | 6.796 | 12.532 | 24.630 | 19.969 | 30.226 | 32.703 | 39.969 | 41.234 | 65.430 | 47.947 | 72.930 | 67.530 | 81.564 | 163.493 | 146.521 |
| N4444                              | 0.203  | 0.274 | 0.443 | 0.656 | 2.359 | 2.948 | 3.973 | 7.307 | 10.963 | 19.632 | 20.777 | 35.494 | 38.232 | 46.635 | 48.558 | 52.730 | 56.440 | 85.033 | 79.505 | 89.425 | 156.847 | 156.261 |
| P2221                              | 0.204  | 0.325 | 0.468 | 0.682 | 2.365 | 2.774 | 4.379 | 6.717 | 11.887 | 23.066 | 19.628 | 29.635 | 32.880 | 38.980 | 40.286 | 60.750 | 46.846 | 70.211 | 65.610 | 78.841 | 152.377 | 139.250 |
| P4442                              | 0.206  | 0.282 | 0.451 | 0.672 | 2.397 | 3.005 | 4.125 | 7.634 | 11.389 | 20.717 | 21.698 | 37.814 | 40.860 | 49.735 | 51.952 | 56.477 | 60.603 | 88.038 | 85.606 | 95.495 | 163.899 | 169.304 |
| P4442OH                            | 1.791  | 1.400 | 1.419 | 1.496 | 2.492 | 2.259 | 3.251 | 4.877 | 7.532  | 12.638 | 14.753 | 15.497 | 17.009 | 20.840 | 20.661 | 28.172 | 23.870 | 27.949 | 32.988 | 37.734 | 55.096  | 53.648  |
| P4444                              | 0.189  | 0.257 | 0.419 | 0.632 | 2.364 | 2.995 | 4.032 | 7.544 | 11.503 | 20.787 | 21.817 | 38.758 | 41.835 | 51.349 | 53.595 | 57.416 | 62.547 | 91.961 | 89.141 | 99.321 | 171.163 | 178.355 |
| ENIM                               | 0.272  | 0.506 | 0.666 | 0.621 | 1.739 | 1.673 | 2.965 | 4.079 | 7.418  | 13.628 | 12.615 | 12.006 | 13.115 | 15.063 | 15.280 | 30.113 | 17.582 | 25.622 | 22.683 | 33.703 | 57.843  | 50.703  |
| P4442COOH                          | 11.492 | 5.451 | 3.665 | 3.203 | 2.581 | 1.923 | 2.622 | 3.467 | 5.186  | 7.762  | 9.713  | 7.600  | 8.349  | 9.833  | 9.636  | 14.348 | 10.882 | 12.477 | 14.078 | 17.491 | 23.190  | 22.248  |
| WMIM                               | 0.203  | 0.485 | 0.494 | 0.549 | 1.798 | 1.593 | 3.309 | 3.546 | 8.848  | 17.251 | 12.148 | 10.622 | 11.627 | 13.410 | 13.504 | 37.574 | 15.645 | 23.809 | 20.252 | 32.335 | 64.030  | 49.939  |
| N1111COOH                          | 5.860  | 5.978 | 3.197 | 0.804 | 0.973 | 0.623 | 1.195 | 1.585 | 3.048  | 5.123  | 6.206  | 3.278  | 3.789  | 3.637  | 3.701  | 8.511  | 4.546  | 5.465  | 4.832  | 8.659  | 11.338  | 10.209  |
| WMIM                               | 0.580  | 1.092 | 0.982 | 0.333 | 0.752 | 0.593 | 1.215 | 1.954 | 3.290  | 6.002  | 7.650  | 4.341  | 4.967  | 4.869  | 5.000  | 11.439 | 6.058  | 8.237  | 6.702  | 13.343 | 17.831  | 16.357  |
| N1111OH                            | 0.483  | 1.307 | 1.046 | 0.629 | 1.686 | 1.207 | 2.838 | 2.009 | 7.446  | 14.476 | 8.450  | 5.365  | 5.992  | 6.600  | 6.479  | 27.027 | 7.804  | 10.840 | 9.596  | 16.056 | 32.541  | 22.181  |
| DEA                                | 7.158  | 4.184 | 3.867 | 0.485 | 0.346 | 0.429 | 0.350 | 1.262 | 0.656  | 0.878  | 3.196  | 1.872  | 2.142  | 1.546  | 1.722  | 1.217  | 2.076  | 1.982  | 1.683  | 2.973  | 1.992   | 2.653   |
| MEA                                | 40.349 | 4.530 | 5.486 | 3.731 | 0.162 | 0.642 | 0.125 | 1.425 | 0.292  | 0.327  | 3.038  | 0.621  | 3.201  | 1.987  | 2.436  | 0.591  | 3.042  | 1.938  | 2.286  | 2.875  | 1.363   | 2.318   |
| TEA                                | 2.851  | 5.986 | 3.157 | 0.548 | 0.638 | 0.578 | 0.687 | 1.257 | 1.283  | 1.801  | 3.729  | 1.585  | 1.788  | 1.471  | 1.540  | 2.466  | 1.210  | 2.435  | 1.818  | 3.700  | 3.385   | 3.348   |

## Table S3

| cation    | anion | NO3    | HSO4   | H2PO4  | HC03   | Frc    | Ac     | SCN    | Prp    | Leu    | BEN    | OTf    | DMP    | 2FP60  | 4FP60  | 3FP60  | 2-CP   | BF4    | 4-CP   | 3-CP   | TF2n   | BCN4   | PF6      |
|-----------|-------|--------|--------|--------|--------|--------|--------|--------|--------|--------|--------|--------|--------|--------|--------|--------|--------|--------|--------|--------|--------|--------|----------|
| N2222     |       | 1.7955 | 1.0637 | 0.9918 | 1.6531 | 2.1644 | 1.8246 | 1.7657 | 1.4462 | 1.4947 | 1.6127 | 1.4666 | 1.4916 | 1.6138 | 1.6149 | 1.6177 | 1.6638 | 1.3784 | 1.6435 | 1.6623 | 2.1397 | 2.4584 | 1.5442   |
| P2221     |       | 1.6766 | 1.0172 | 0.9123 | 1.4895 | 1.9389 | 1.6722 | 1.7345 | 1.3758 | 1.3628 | 1.5684 | 1.4522 | 1.4615 | 1.6010 | 1.6004 | 1.6111 | 1.6639 | 1.3643 | 1.6404 | 1.6642 | 2.1802 | 2.5364 | 1.6180   |
| N1111OH   |       | 0.8059 | 0.3252 | 0.9421 | 2.0724 | 2.7384 | 1.4983 | 0.3892 | 0.7780 | 0.6775 | 0.6679 | 0.3303 | 0.7492 | 0.5518 | 0.6016 | 0.5649 | 0.6250 | 0.1679 | 0.6786 | 0.6736 | 1.6973 | 1.2419 | 0.2550   |
| P4444     |       | 1.9355 | 1.5289 | 0.9614 | 1.3082 | 1.5730 | 1.4870 | 2.4102 | 1.4774 | 1.5919 | 1.7906 | 1.8618 | 1.7694 | 1.8966 | 1.8277 | 1.8904 | 1.9619 | 2.1968 | 1.8679 | 1.9167 | 2.2271 | 2.9666 | 2.5260   |
| WMIM      |       | 1.0093 | 0.8815 | 0.8338 | 1.5712 | 2.0673 | 1.4443 | 0.6762 | 0.9391 | 0.8584 | 0.9618 | 0.6707 | 0.9270 | 0.8632 | 0.9114 | 0.8894 | 0.9359 | 0.4551 | 0.9700 | 0.9756 | 2.0275 | 1.4821 | 0.6295   |
| P4442     |       | 1.8358 | 1.3897 | 0.8921 | 1.2428 | 1.5170 | 1.4378 | 2.2824 | 1.4258 | 1.5372 | 1.7496 | 1.8238 | 1.7157 | 1.8852 | 1.8276 | 1.8917 | 1.9691 | 2.0800 | 1.8331 | 1.9354 | 2.3430 | 3.0638 | 2.5543   |
| N4444     |       | 1.8290 | 1.4382 | 0.8892 | 1.2042 | 1.4391 | 1.3556 | 2.3228 | 1.3537 | 1.4752 | 1.6823 | 1.7868 | 1.6603 | 1.8213 | 1.7524 | 1.8224 | 1.9031 | 2.1273 | 1.8047 | 1.8600 | 2.2975 | 3.0444 | 2.5836   |
| N11116    |       | 1.5994 | 1.3870 | 0.9675 | 1.0197 | 1.1140 | 1.0580 | 2.2254 | 1.1035 | 1.2115 | 1.4925 | 1.7954 | 1.3041 | 1.8759 | 1.8395 | 1.9311 | 2.0334 | 2.2685 | 1.9436 | 2.0187 | 3.0009 | 3.7065 | 3.4485   |
| ENIM      |       | 0.8054 | 0.4549 | 0.5499 | 0.9603 | 1.1820 | 1.0196 | 0.7386 | 0.8410 | 0.8392 | 0.8858 | 0.8193 | 0.9406 | 0.9912 | 1.0275 | 1.0327 | 1.0954 | 0.6118 | 1.1074 | 1.1298 | 2.2674 | 1.9203 | 1.1325   |
| P4442OH   |       | 1.2712 | 1.0199 | 0.6253 | 0.8319 | 1.0007 | 0.9801 | 1.6741 | 1.0057 | 1.1112 | 1.2819 | 1.3221 | 1.2561 | 1.4147 | 1.3804 | 1.4293 | 1.5039 | 1.7547 | 1.4385 | 1.4794 | 2.8596 | 3.1924 | 3.7358   |
| P4442COOH |       | 0.9535 | 0.8072 | 0.4956 | 0.5994 | 0.6943 | 0.6847 | 1.4004 | 0.7395 | 0.8441 | 1.0178 | 1.1038 | 0.9574 | 1.2839 | 1.2694 | 1.4227 | 1.5290 | 1.3613 | 1.4113 | 3.6886 | 3.4576 | 5.8730 |          |
| N1111COOH |       | 0.1503 | 0.0772 | 0.2237 | 0.4064 | 0.5491 | 0.4995 | 0.1125 | 0.4685 | 0.4839 | 0.4613 | 0.2689 | 0.5805 | 0.4911 | 0.5519 | 0.5521 | 0.6539 | 0.6596 | 0.7259 | 0.7489 | 2.7436 | 1.7579 | 1.0823   |
| WMIM      |       | 0.1358 | 0.0633 | 0.1726 | 0.3223 | 0.4617 | 0.4369 | 0.1057 | 0.4215 | 0.4581 | 0.4148 | 0.2969 | 0.5629 | 0.4934 | 0.5526 | 0.5607 | 0.6555 | 0.0725 | 0.7173 | 0.7477 | 2.4648 | 1.8609 | 1.0130   |
| TEA       |       | 0.0373 | 0.0240 | 0.0604 | 0.0952 | 0.1335 | 0.1799 | 0.0483 | 0.2540 | 0.3091 | 0.2838 | 0.1591 | 0.4357 | 0.3359 | 0.3829 | 0.3954 | 0.4924 | 0.0268 | 0.5468 | 0.5742 | 1.9287 | 1.5053 | 0.8959   |
| DEA       |       | 0.0085 | 0.0065 | 0.0135 | 0.0199 | 0.0315 | 0.0646 | 0.0262 | 0.1383 | 0.1939 | 0.1953 | 0.1386 | 0.3010 | 0.3368 | 0.4054 | 0.4154 | 0.5822 | 0.0228 | 0.6882 | 0.7376 | 2.5352 | 2.7065 | 6.4038   |
| MEA       |       | 0.0010 | 0.0013 | 0.0020 | 0.0028 | 0.0053 | 0.0123 | 0.0605 | 0.0782 | 0.1243 | 0.1522 | 0.1568 | 0.2033 | 0.4712 | 0.6234 | 0.7781 | 1.0040 | 1.1454 | 1.2414 | 1.4648 | 4.0289 | 5.7164 | 232.2705 |

## Figs

**Fig. S1**  $^1\text{H}$  NMR spectra of [MEA][Frc]

**Fig. S2**  $^1\text{H}$  NMR spectra of [MEA][Ac]

**Fig. S3**  $^1\text{H}$  NMR spectra of [MEA][Prp]

**Fig. S4**  $^1\text{H}$  NMR spectra of [DEA][Ac]

**Fig. S5**  $^1\text{H}$  NMR spectra of [TEA][Ac]

**Fig. S6**  $^1\text{H}$  NMR spectra of fresh and recycled [MEA][Ac]

**Fig. S1**

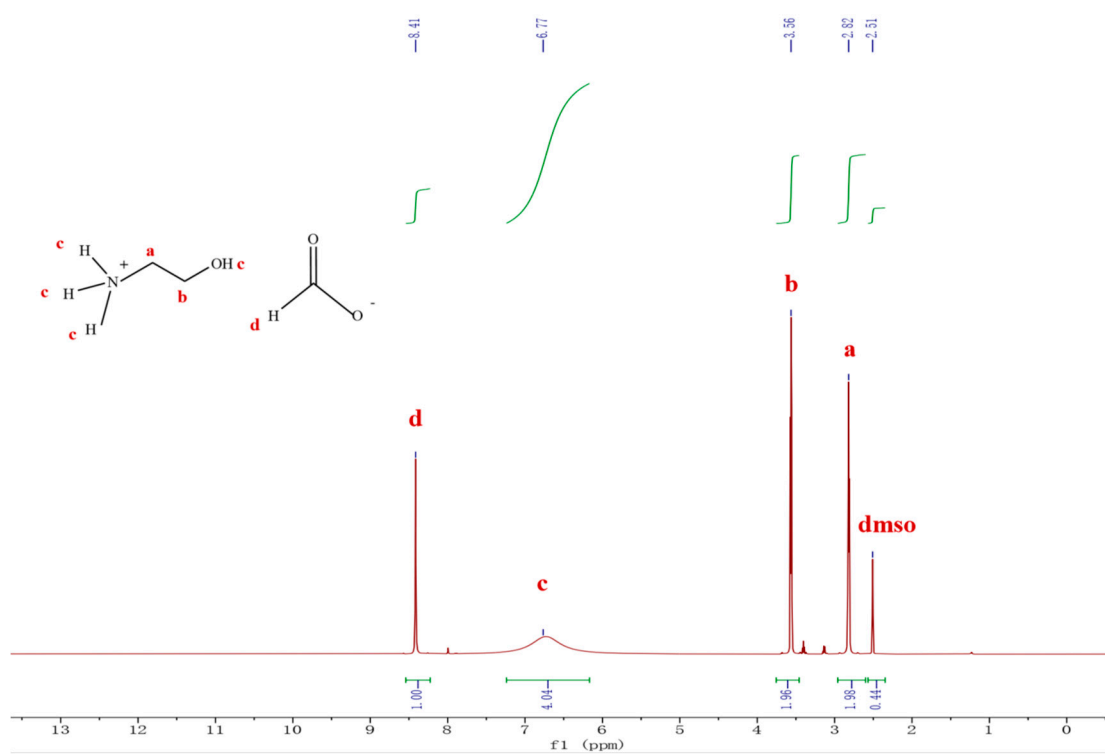

**Fig. S2**

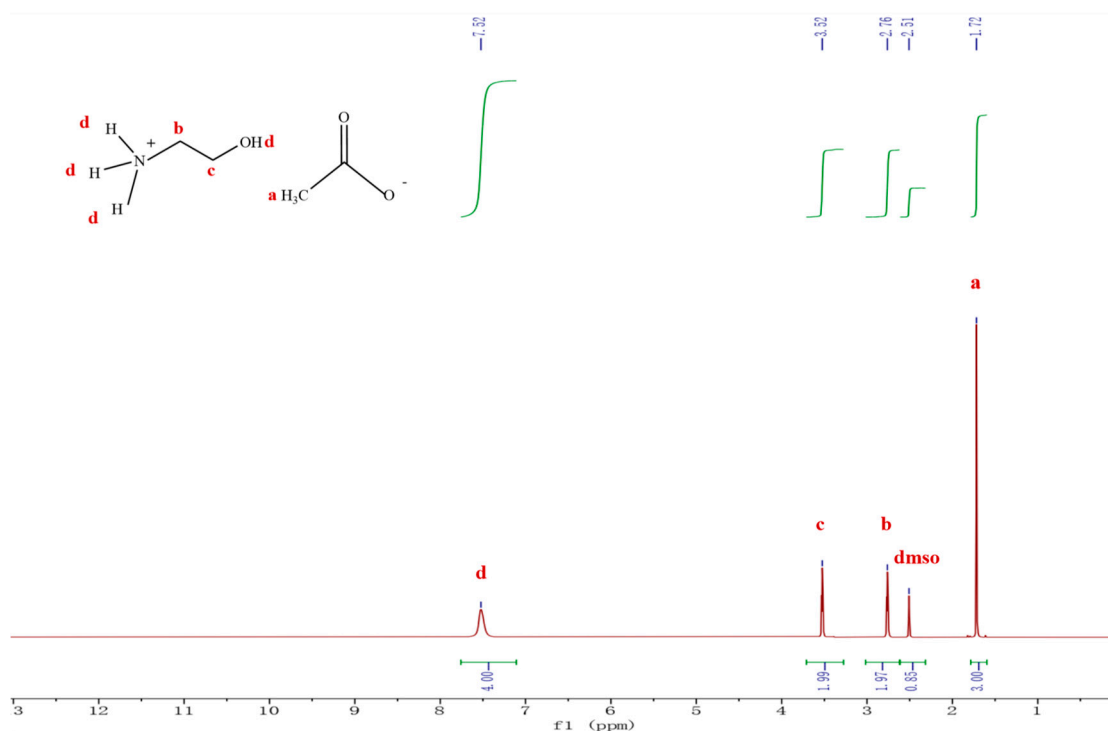

Fig. S3

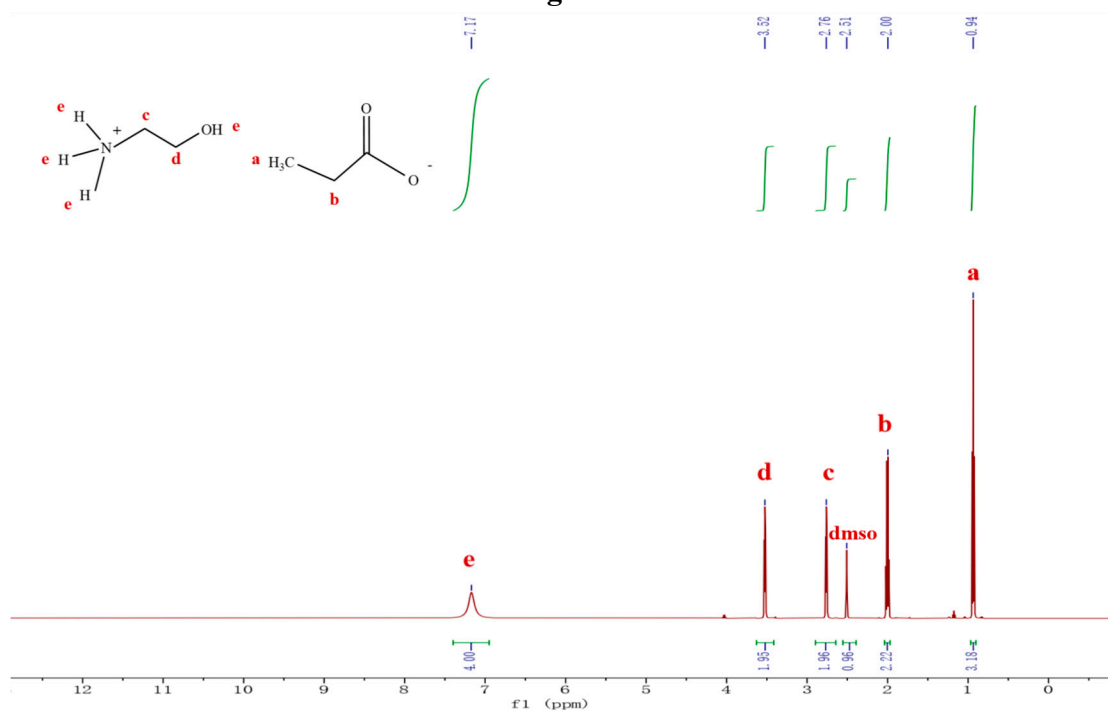

Fig. S4

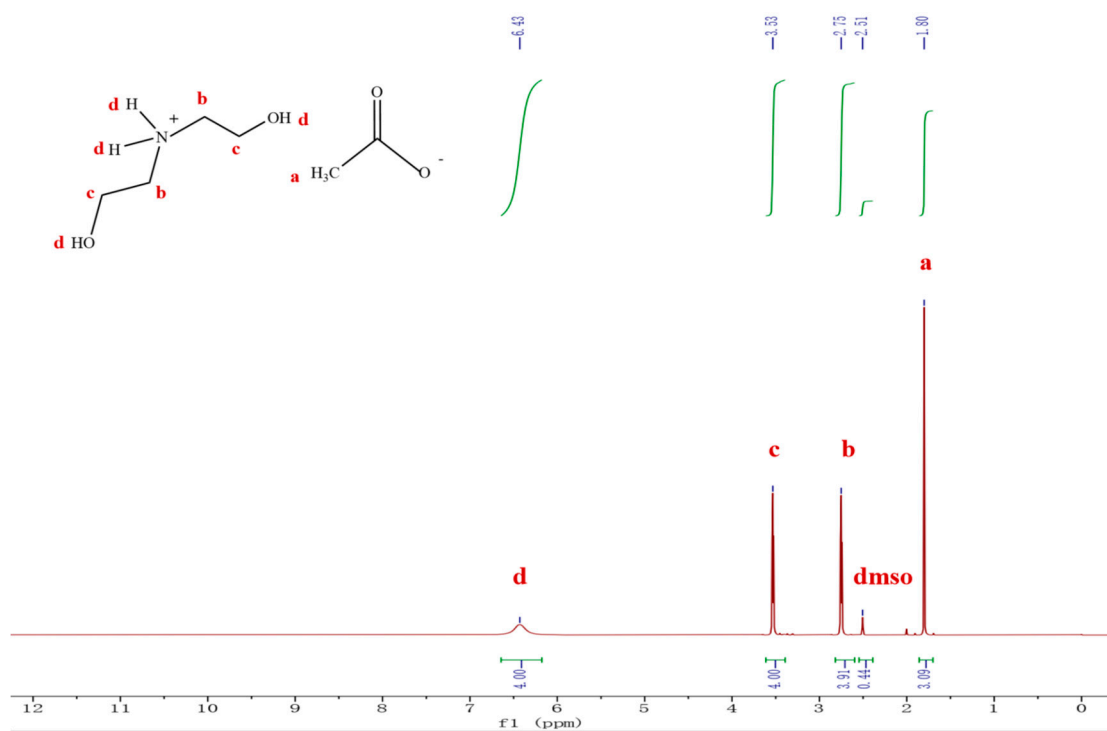

Fig. S5

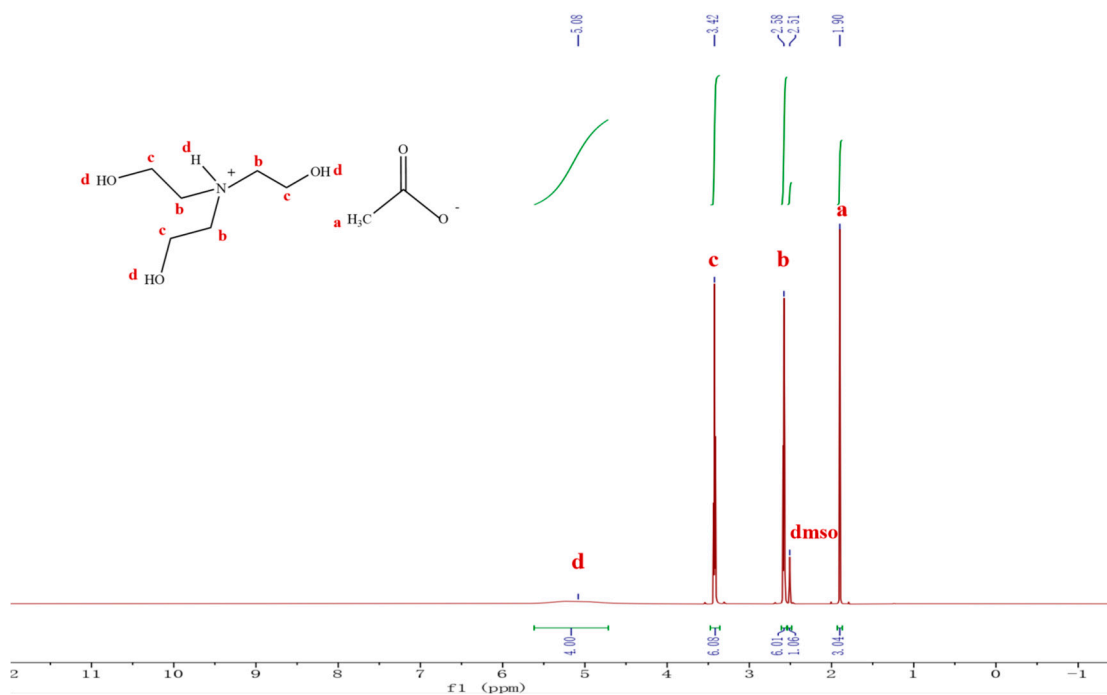

Fig. S6

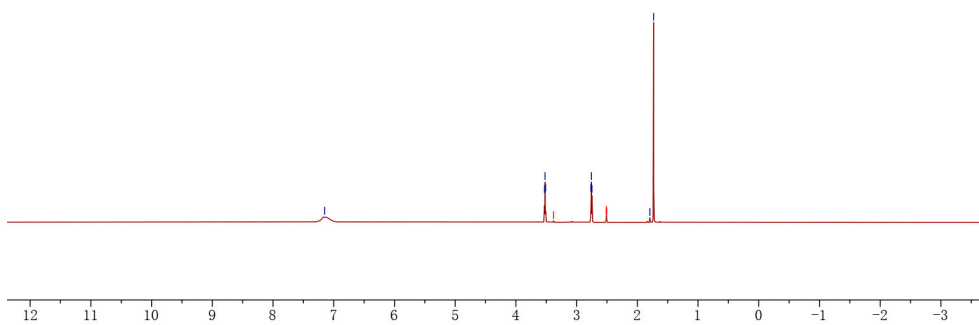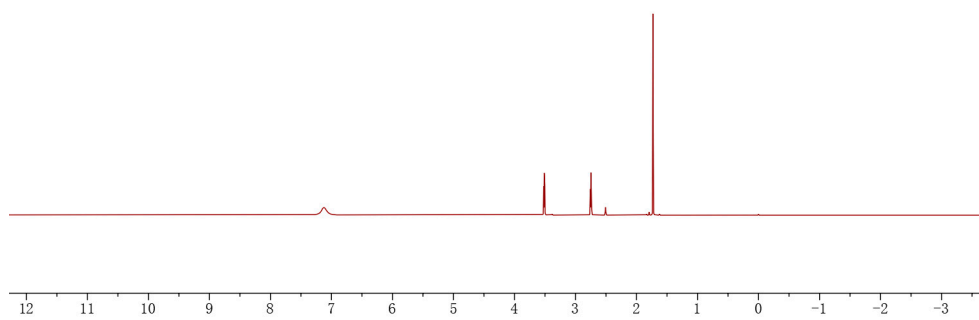

Supplement: s1 [file s1]
